# Supplementary material
Source: PubMed Central journal article supplement (PMC3812703)

## Supporting Information for: Indolo[3,2-*a*]carbazoles from a Deep-water Sponge of the Genus *Asteropus*

Floyd Russell, Dedra Harmody, Peter J. McCarthy, Shirley A. Pomponi and Amy E. Wright\*

*Marine Biomedical and Biotechnology Program, Harbor Branch Oceanographic Institute, Florida Atlantic University. 5600 US 1 North, Ft. Pierce, Florida 34946*

Corresponding Author:

Wright: Tel: 772-242-2459 x 459; E-mail: awrigh33@hboi.fau.edu

S1 A: Partial structure showing the 1,2,4 substituted aromatic ring spin system based upon the 2D DQF-gCOSY spectrum B: Key long range  $^1\text{H}$ - $^{13}\text{C}$  couplings seen in the  $^1\text{H}$ - $^{13}\text{C}$  HMBC and Band selective  $^1\text{H}$ - $^{13}\text{C}$  HMBC spectra which support the first indole ring in **1**.

S2. Partial structure showing key  $^1\text{H}$ - $^{13}\text{C}$  long range couplings observed in the  $^1\text{H}$ - $^{13}\text{C}$  g-HMBC spectrum and Band Selective  $^1\text{H}$ - $^{13}\text{C}$  g-HMBC spectrum which support the second indole ring in **1**

S3. Key HMBC Correlations that support the linking of the two indole rings with the C-6/C-7 spin system for **1**.

S4. Structure of **1** with key NOESY correlations

S5. Table of NMR data for **1**

S6.  $^1\text{H}$  NMR spectrum of **1** (600 MHz  $d_6$ -DMSO).

S7.  $^{13}\text{C}$  NMR spectrum of **1** (150.01 MHz  $d_6$ -DMSO).

S8. 2D g-DQF-COSY spectrum of **1** (600 MHz  $d_6$ -DMSO).

S9. Expansion of 2D g-DQF-COSY spectrum of **1** (600 MHz  $d_6$ -DMSO).

S10. Edited 2D g-HSQC spectrum of **1** (600 MHz  $d_6$ -DMSO).

S11.  $^1\text{H}$ - $^{13}\text{C}$ -g-HMBC spectrum of **1** (600 MHz  $d_6$ -DMSO).

S12. Band Selective  $^1\text{H}$ - $^{13}\text{C}$ -g-HMBC spectrum of **1** (600 MHz  $d_6$ -DMSO).

S13. Expansion of 2D-NOESY spectrum of **1** (600 MHz  $d_6$ -DMSO).

S14. Expansion of 2D-NOESY spectrum of **1** (600 MHz  $d_6$ -DMSO).

S15.  $^1\text{H}$ - $^{15}\text{N}$ -HMBC spectrum of **1** (600 MHz  $d_6$ -DMSO).

S16. Key HMBC Correlations that support the structure assignment for **2**.

S17. Comparison of chemical shifts for molecules **1** and **2** for atoms 1 to 4 resulting from sulfate substitution at C-3 .

S18.  $^1\text{H}$  NMR spectrum of **2** (600 MHz  $d_6$ -DMSO).

S19.  $^{13}\text{C}$  NMR spectrum of **2** (150.01 MHz  $d_6$ -DMSO).

S20. Table of NMR data for **2**.

S21. Edited g-HSQC spectrum of **2** (600 MHz  $d_6$ -DMSO).

S22.  $^1\text{H}$ - $^{13}\text{C}$  g-HMBC spectrum of **2** (600 MHz  $d_6$ -DMSO).

Fig S1. A: Partial structure showing the 1,2,4 substituted aromatic ring spin system based upon the 2D DQF-gCOSY spectrum B: Key long range  $^1\text{H}$ - $^{13}\text{C}$  couplings seen in the  $^1\text{H}$ - $^{13}\text{C}$  HMBC and Band selective  $^1\text{H}$ - $^{13}\text{C}$  HMBC spectra which support the first indole ring.

A

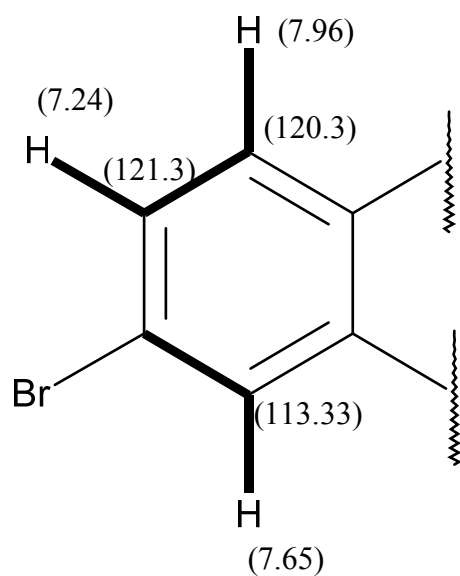

B

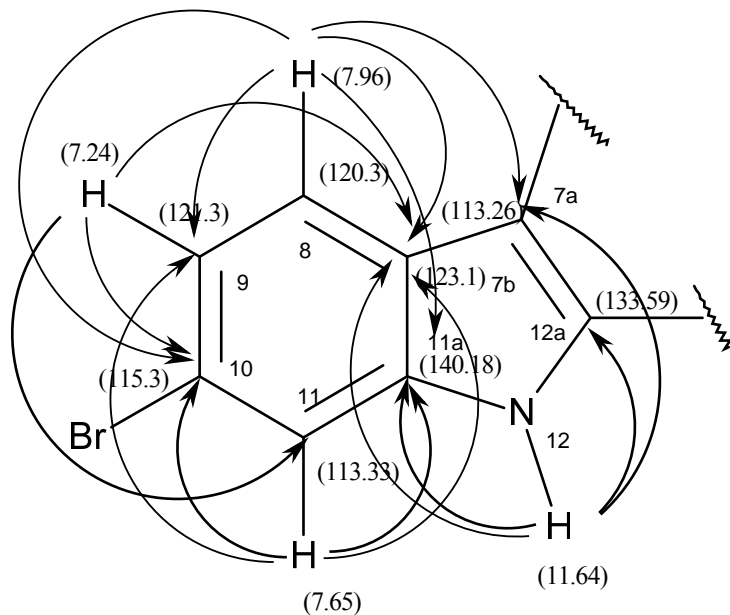

**Fig S2.** Partial structure showing key  $^1\text{H}$ - $^{13}\text{C}$  long range couplings observed in the  $^1\text{H}$ - $^{13}\text{C}$  g-HMBC spectrum and Band Selective  $^1\text{H}$ - $^{13}\text{C}$  g-HMBC spectrum which support the second indole ring

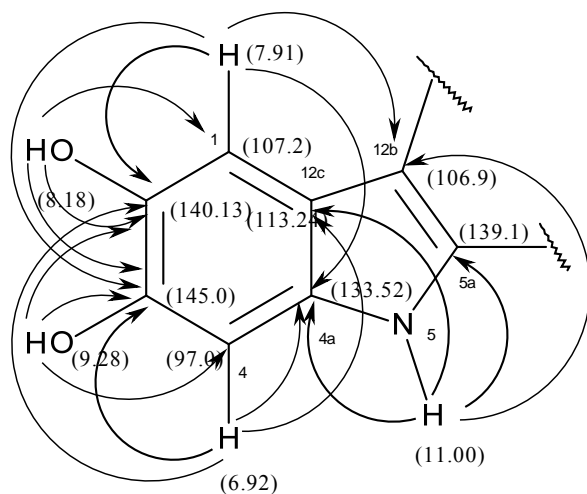

**Fig S3.** Key HMBC Correlations that support the linking of the two indole rings with the C-6/C-7 spin system.

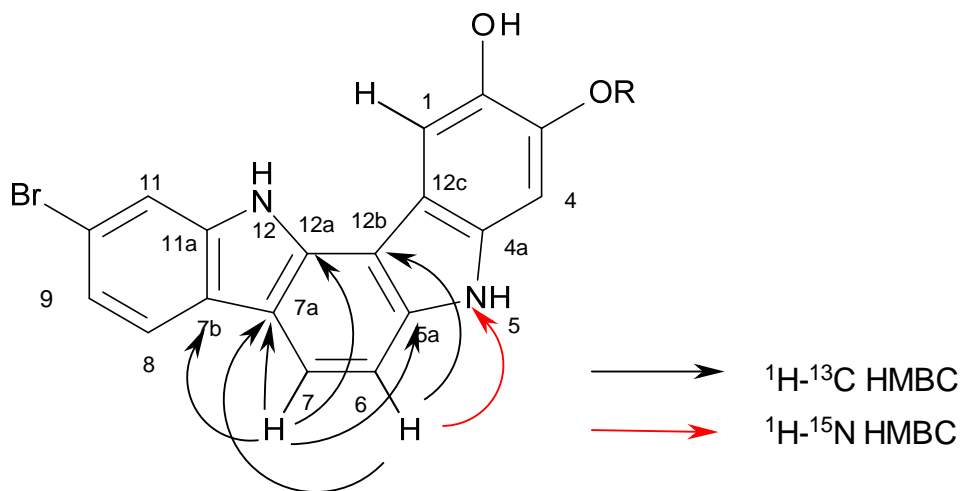

**Fig S4** Structure of **1** with key NOESY correlations

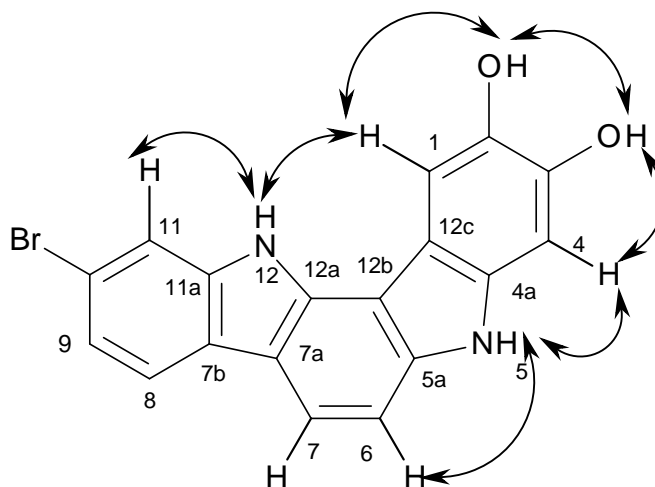

**S5. Table of  $^1\text{H}$  and  $^{13}\text{C}$  NMR Data for **1** (DMSO-*d*<sub>6</sub>, 600 MHz)**

| Position | $\delta_{\text{C}}$ , mult | $\delta_{\text{N}}$ | $\delta_{\text{H}}$ ( <i>J</i> in Hz) | COSY   | HMBC                 | NOESY      |
|----------|----------------------------|---------------------|---------------------------------------|--------|----------------------|------------|
| 1        | 107.2, CH                  |                     | 7.91, s                               |        | 2, 3, 4a, 12b, 12c   | NH-12      |
| 2        | 140.13, C <sup>b</sup>     |                     |                                       |        |                      |            |
| OH-2     |                            |                     | 8.18, s                               |        | 1, 2, 3              | OH-3       |
| 3        | 145.0, C                   |                     |                                       |        |                      |            |
| OH-3     |                            |                     | 9.28, s                               |        | 2, 3, 4              | OH-2, 4    |
| 4        | 97.0, CH                   |                     | 6.92, s                               |        | 2, 3, 4a, 12c, N-5   | NH-5, OH-3 |
| 4a       | 133.52, C                  |                     |                                       |        |                      |            |
| 5        |                            | 113                 | 11.00, bs                             |        | 4a, 5a, 12b, 12c     | 4, 6       |
| 5a       | 139.1, C                   |                     |                                       |        |                      |            |
| 6        | 104.1, CH                  |                     | 7.20, d (8.2)                         | 8'     | 7a, 12b, N-5         | NH-5       |
| 7        | 116.0, CH                  |                     | 7.89, d (8.2)                         | 8      | 5a, 7a, 7b, 12a      |            |
| 7a       | 113.26, C <sup>b</sup>     |                     |                                       |        |                      |            |
| 7b       | 123.1, C                   |                     |                                       |        |                      |            |
| 8        | 120.3, CH                  |                     | 7.96, d (8.0)                         | 5'     | 7a, 7b, 10, 11a      |            |
| 9        | 121.3, CH                  |                     | 7.24, dd (8.0, 1.4)                   | 4', 7' | 7b, 10, 11           |            |
| 10       | 115.3, C                   |                     |                                       |        |                      |            |
| 11       | 113.33, CH <sup>b</sup>    |                     | 7.65, d (1.4)                         |        | 7b, 9, 10, 11a, N-12 | NH-12      |
| 11a      | 140.18, C <sup>b</sup>     |                     |                                       |        |                      |            |
| 12       |                            | 112                 | 11.64, bs                             |        | 12a, 7a, 7b, 11a     | 1, 11      |
| 12a      | 133.59, C                  |                     |                                       |        |                      |            |
| 12b      | 106.9, C                   |                     |                                       |        |                      |            |
| 12c      | 113.24, C <sup>b</sup>     |                     |                                       |        |                      |            |

<sup>a</sup>HMBC correlations, optimized for 8 Hz, are from proton(s) stated to the indicated atom;  $^1\text{H}$  and  $^{13}\text{C}$  NMR data were measured at 600.2 and 150.9 respectively. <sup>b</sup>Congested areas of the spectrum; assignments were made on the basis of a band selective  $^1\text{H}$ - $^{13}\text{C}$  g-HMBC experiment. Two decimal places are shown to distinguish resonances of very similar chemical shifts, but which could be clearly resolved in the band selective experiment.

S6.  $^1\text{H}$  NMR spectrum of **1** (600 MHz  $d_6$ -DMSO).

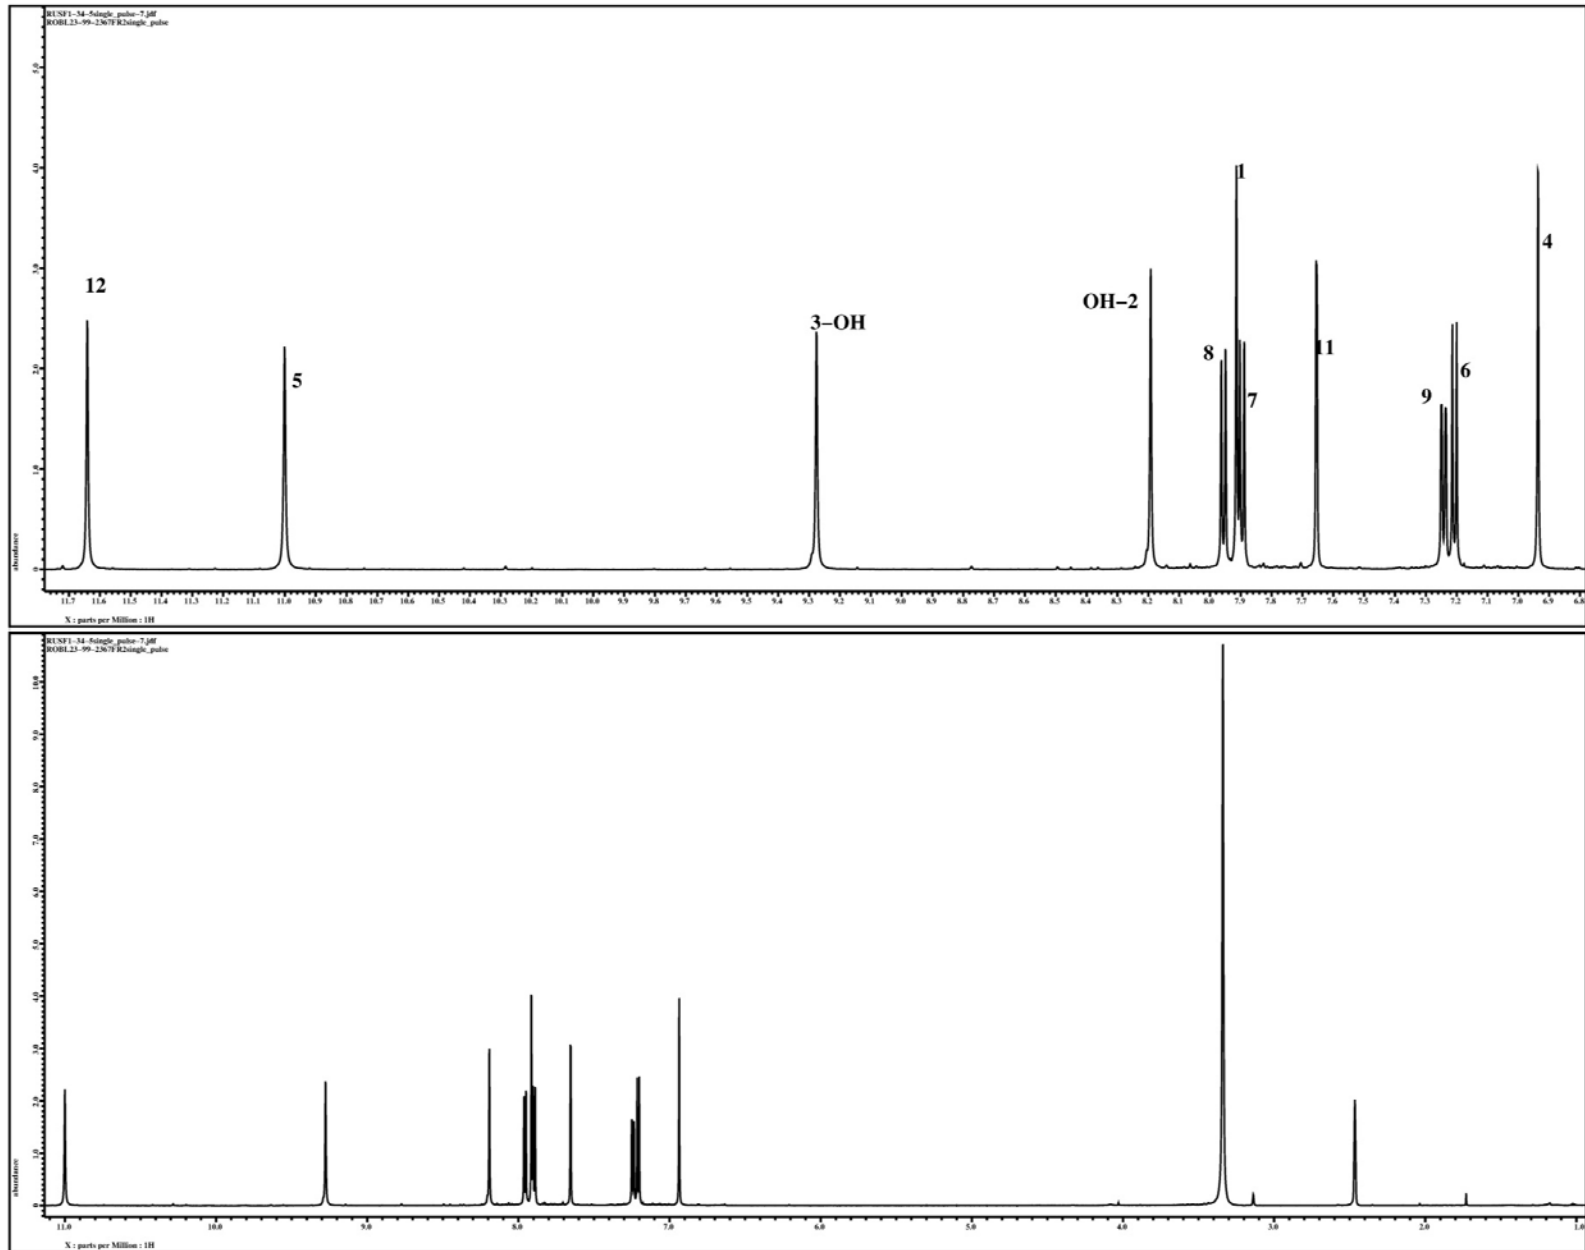

S7.  $^{13}\text{C}$  NMR Spectrum of **1** (150.9 MHz  $d_6$ -DMSO).

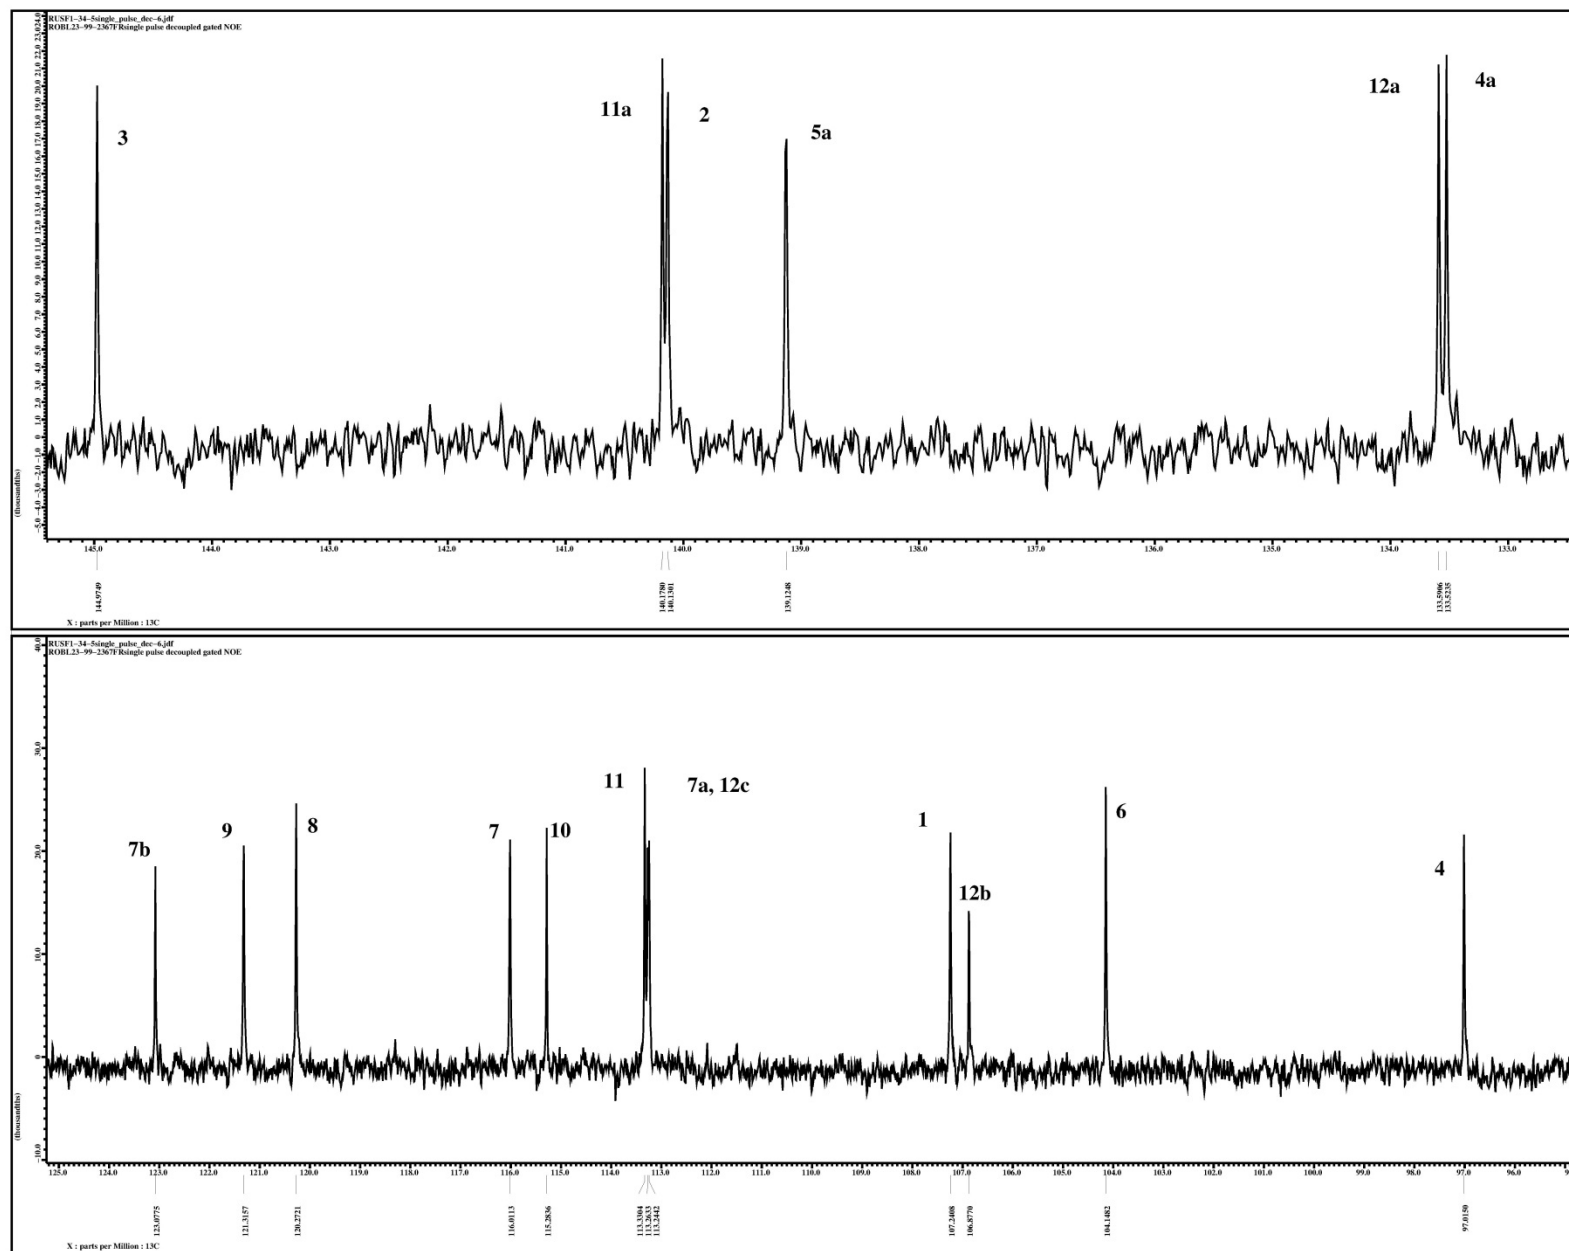

S8. g-DQF-COSY spectrum of **1** (600 MHz  $d_6$ -DMSO).

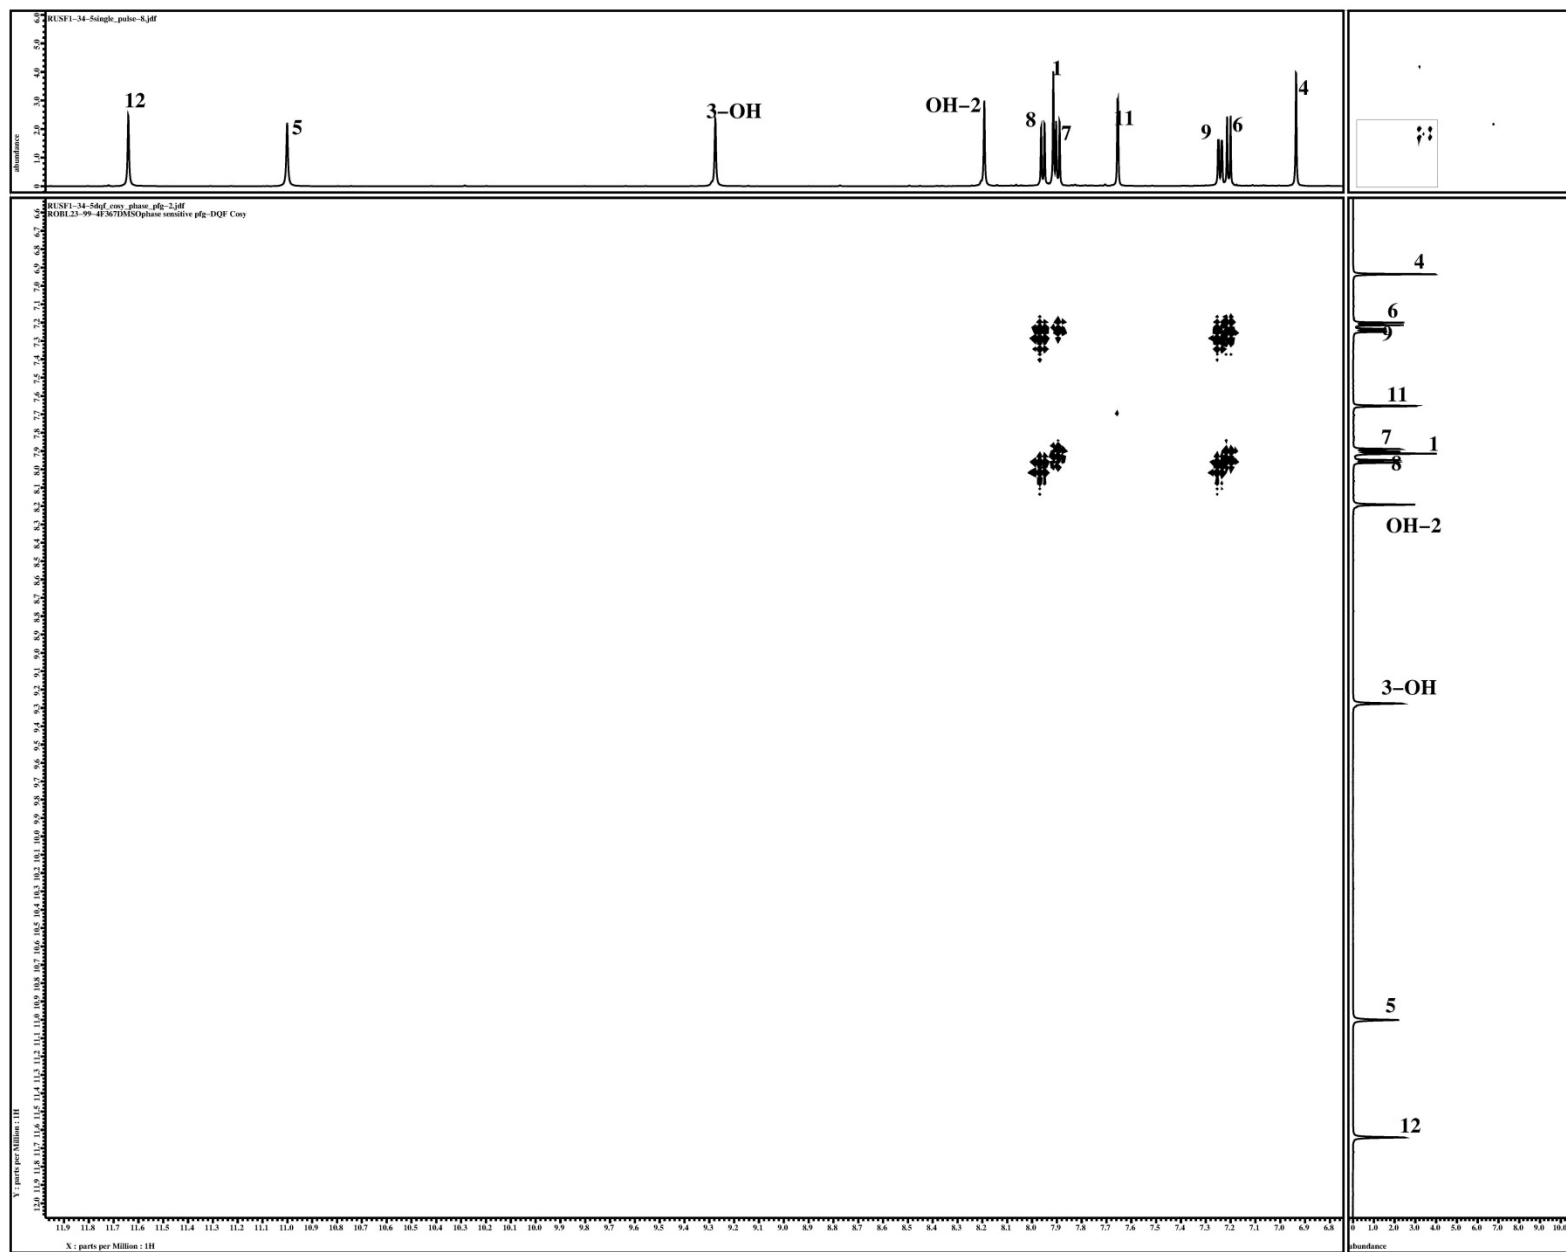

S9. Expansion of g-DQF-COSY spectrum of **1** (600 MHz  $d_6$ -DMSO).

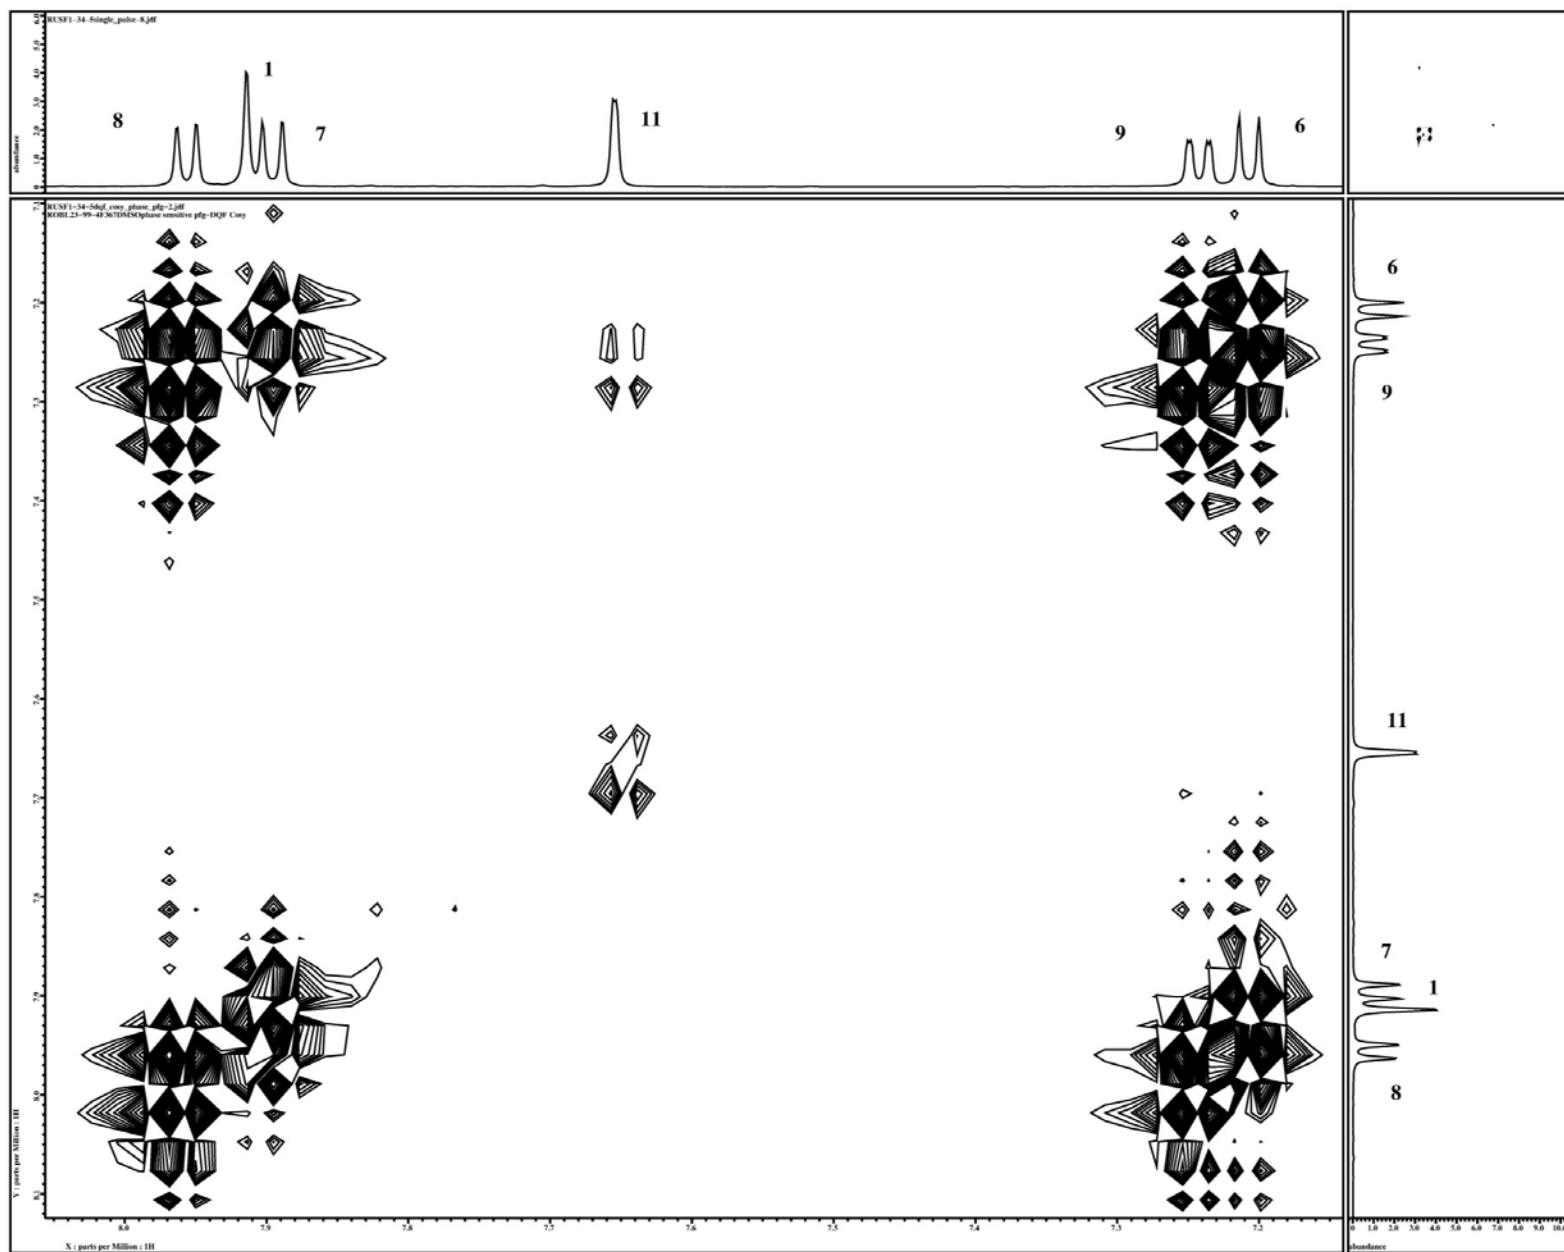



S10. Edited g-HSQC spectrum of **1** (600 MHz  $d_6$ -DMSO).

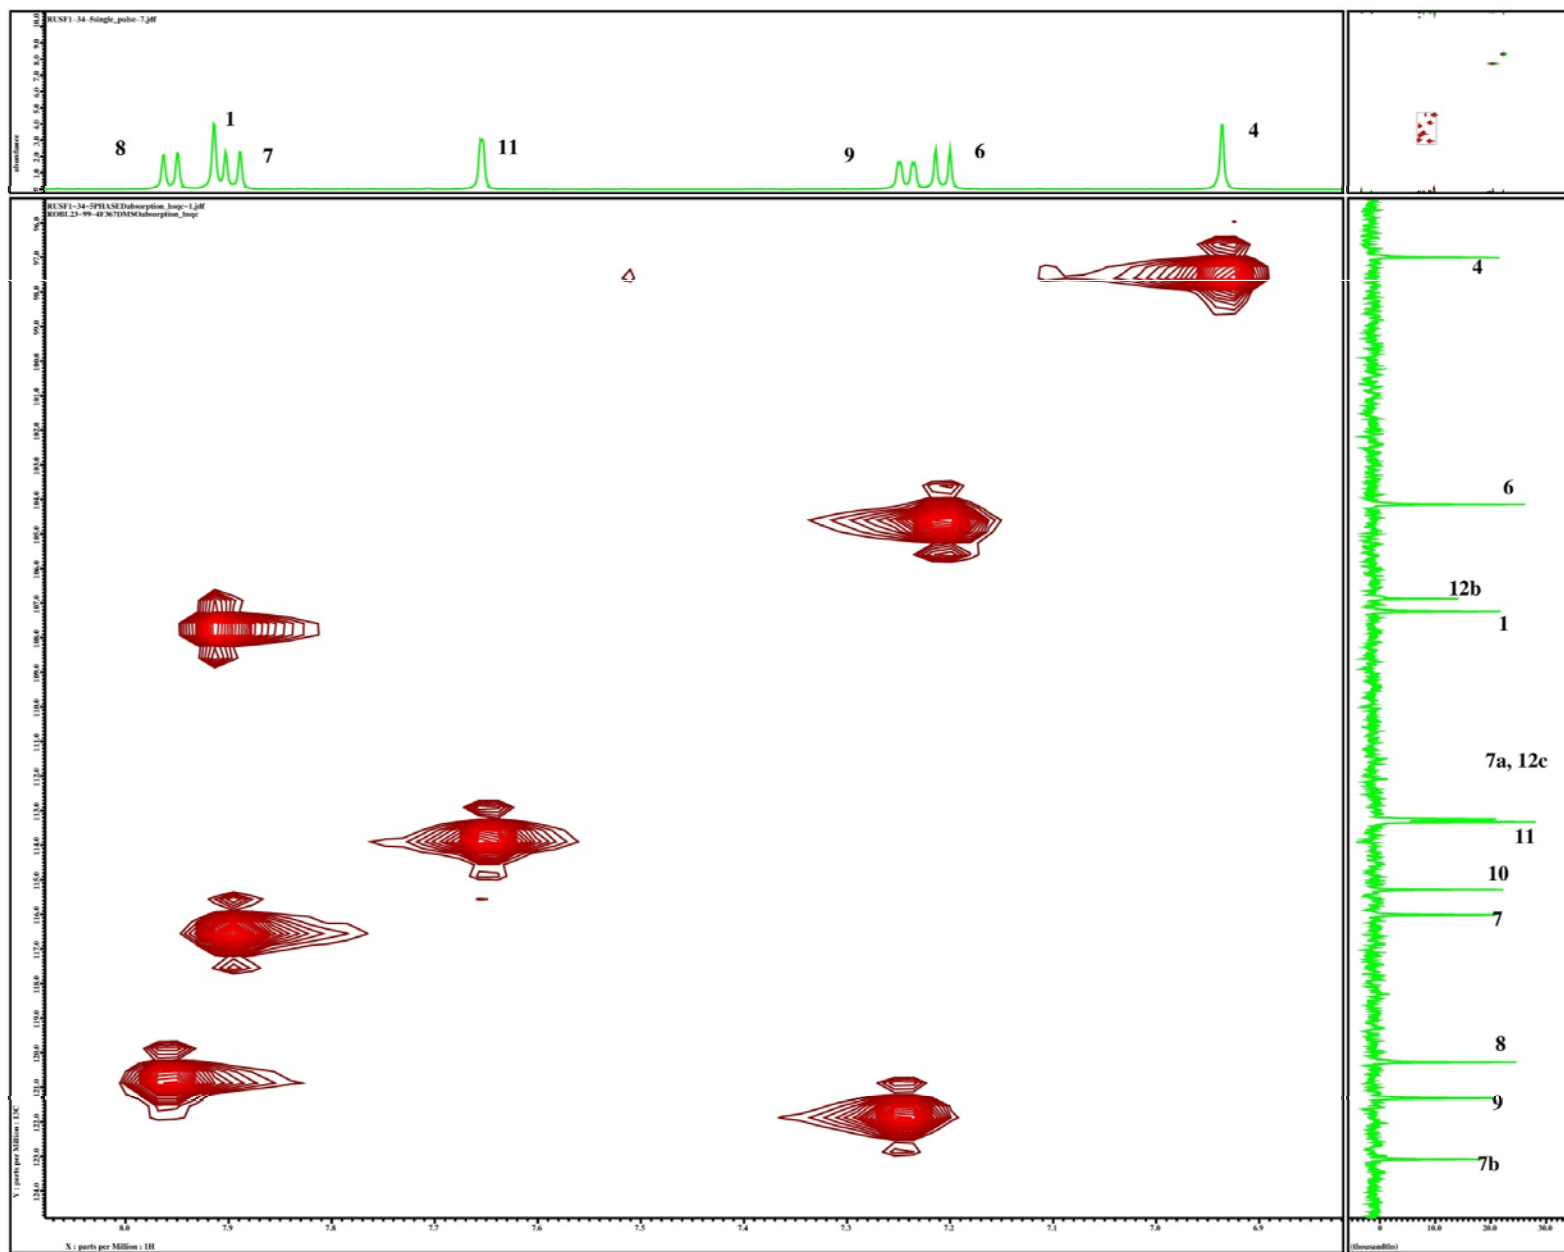

S11.  $^1\text{H}$ - $^{13}\text{C}$ -HMBC Spectrum of **1** (600 MHz  $d_6$ -DMSO).

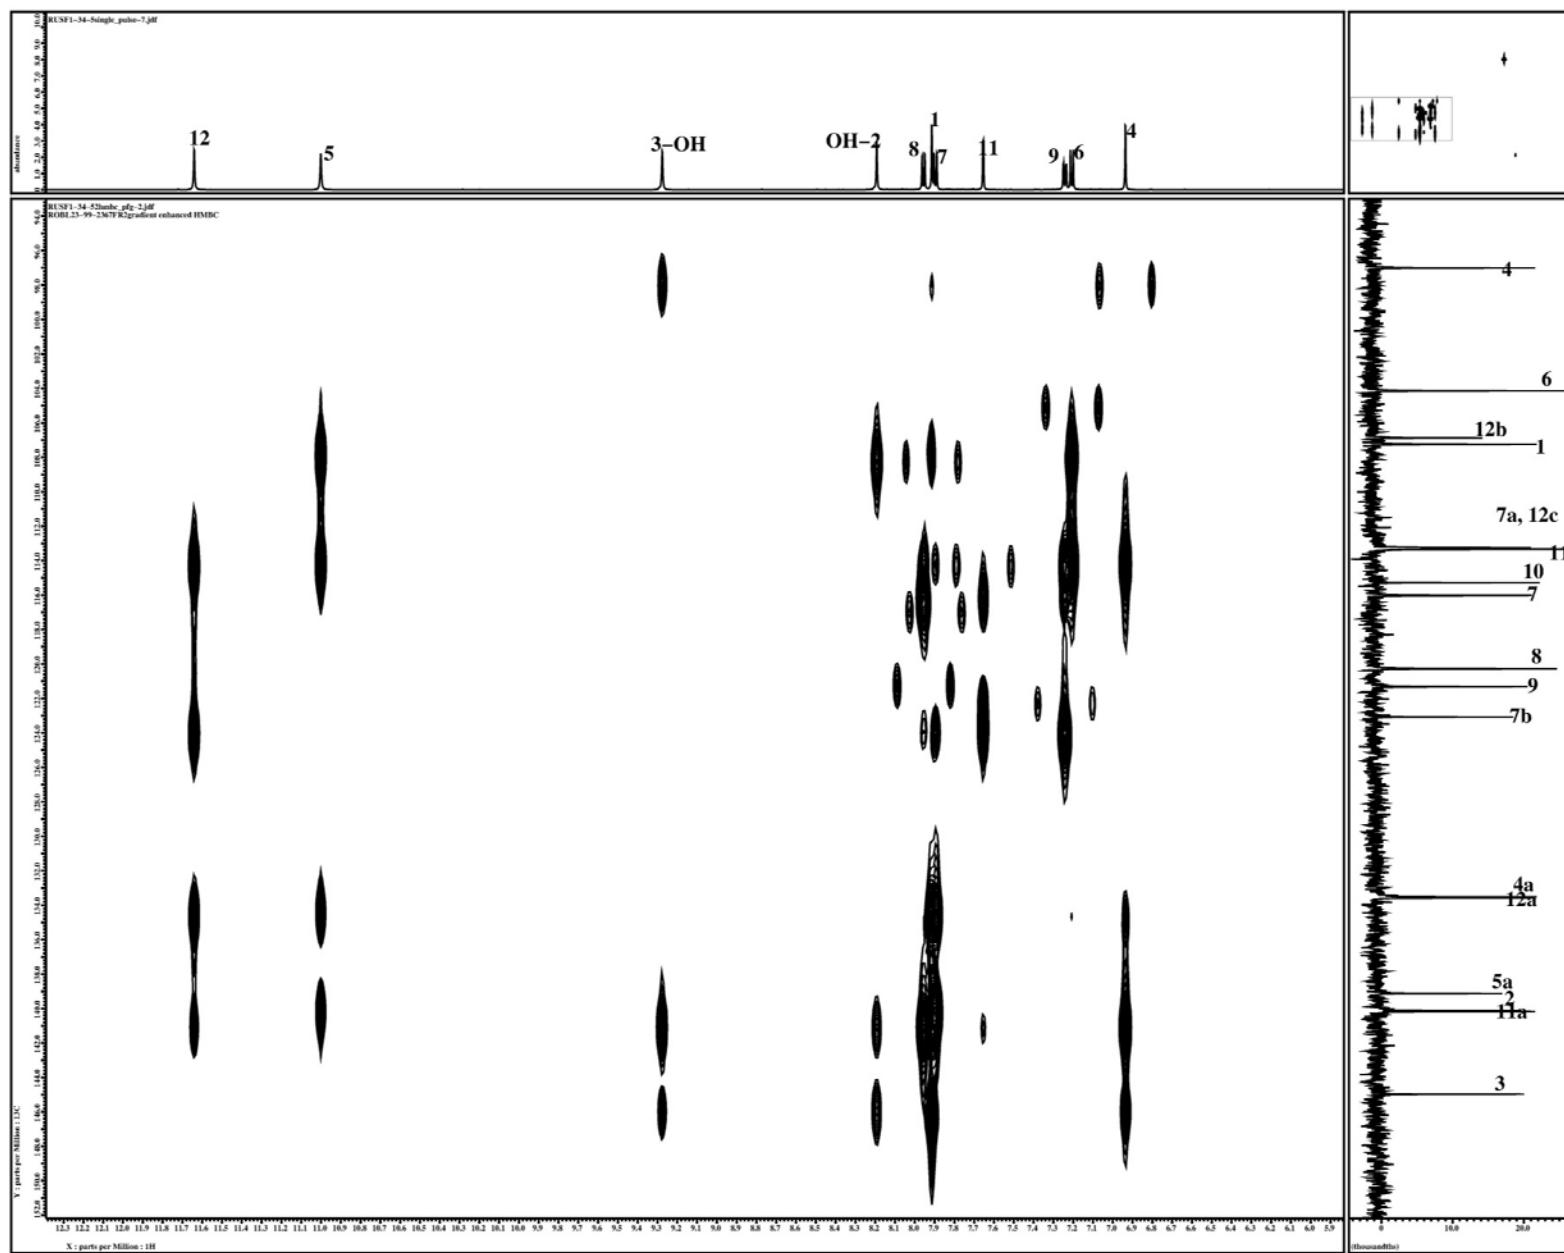

S12. Band Selective  $^1\text{H}$ - $^{13}\text{C}$ -HMBC Spectrum of **1** (600 MHz  $d_6$ -DMSO).

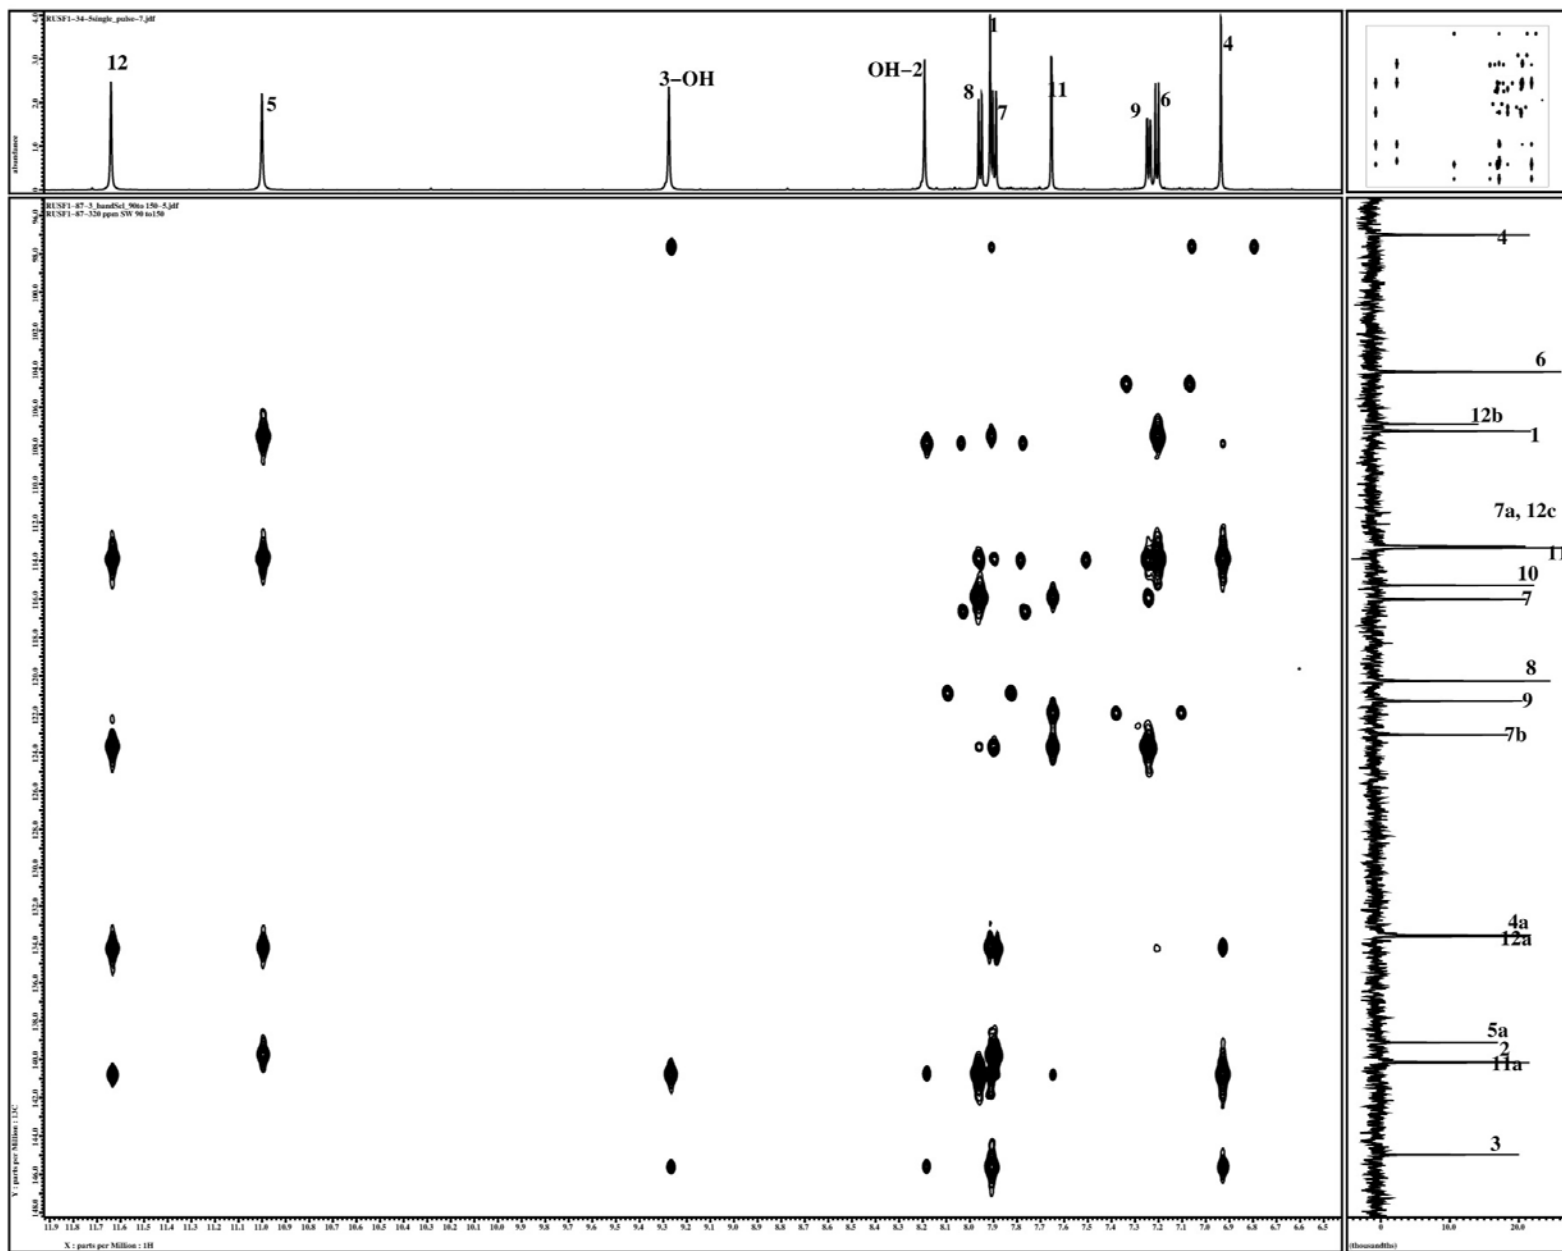

S13. Expansion of 2D-NOESY Spectrum of **1** (600 MHz  $d_6$ -DMSO).

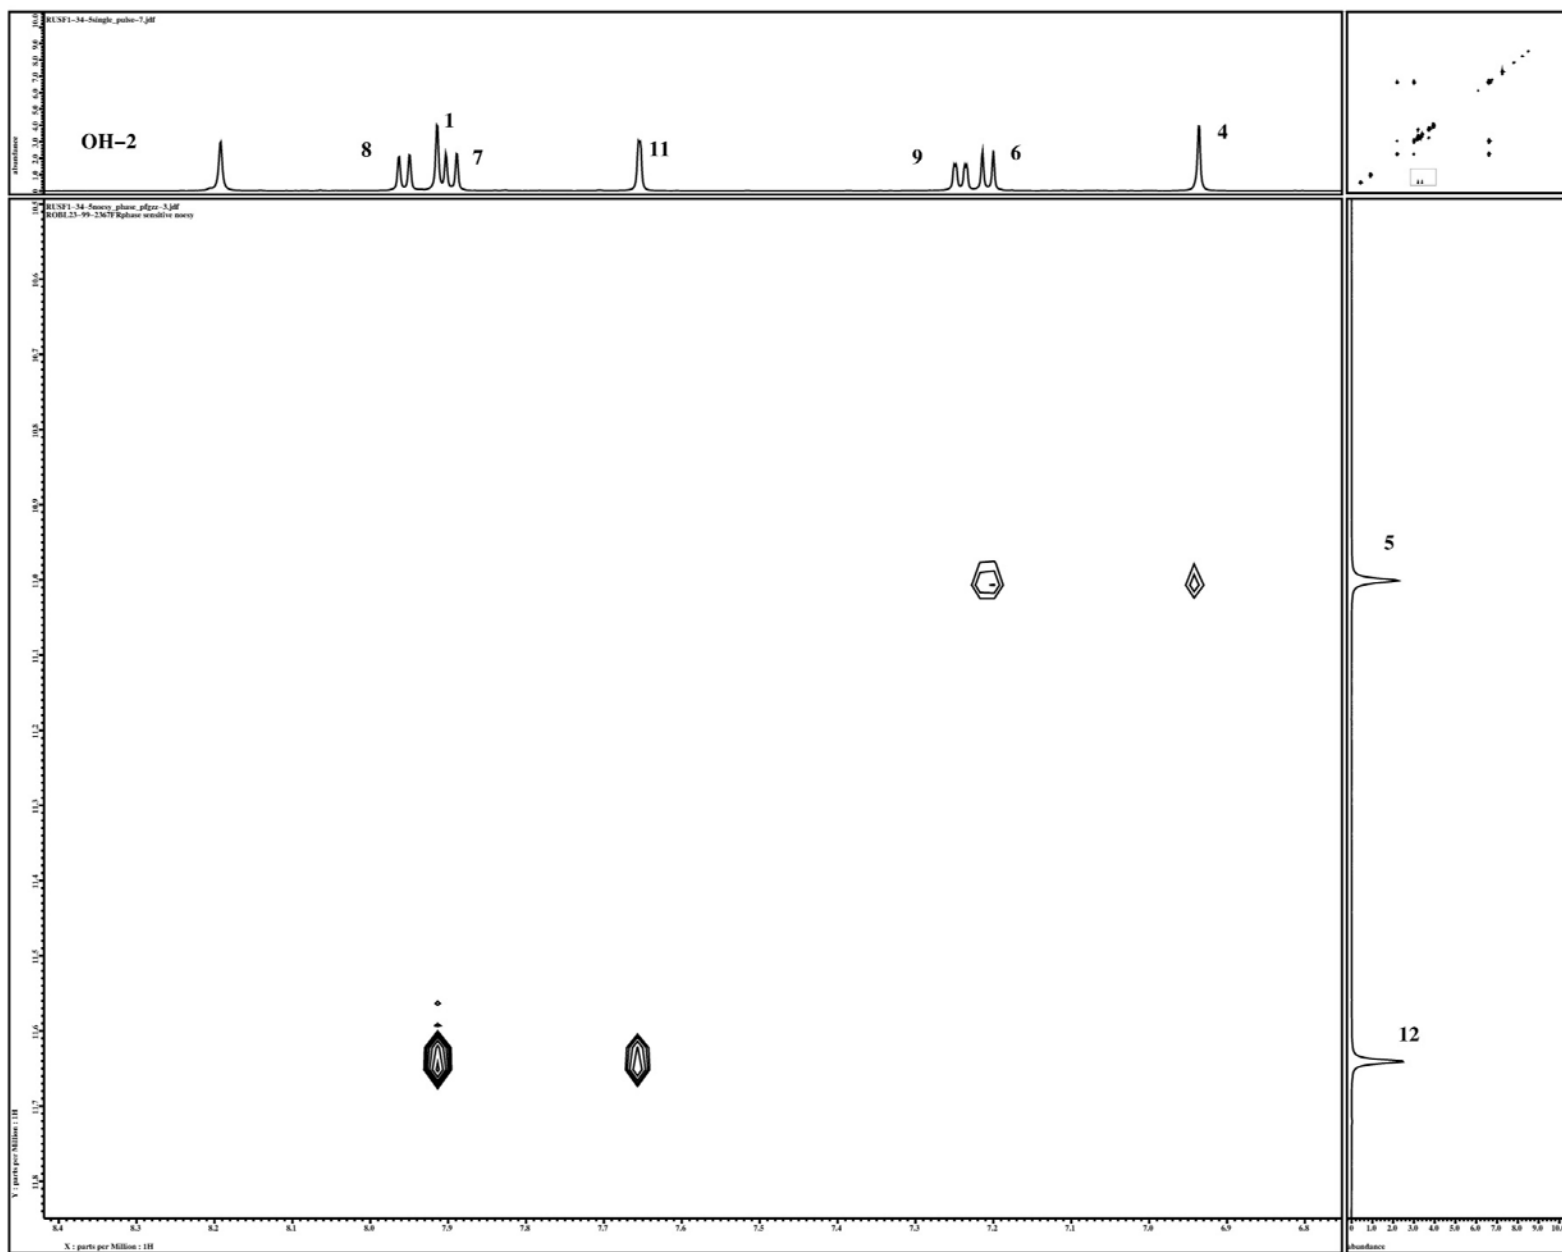

S14. Expansion of 2D-NOESY Spectrum of **1** (600 MHz  $d_6$ -DMSO).

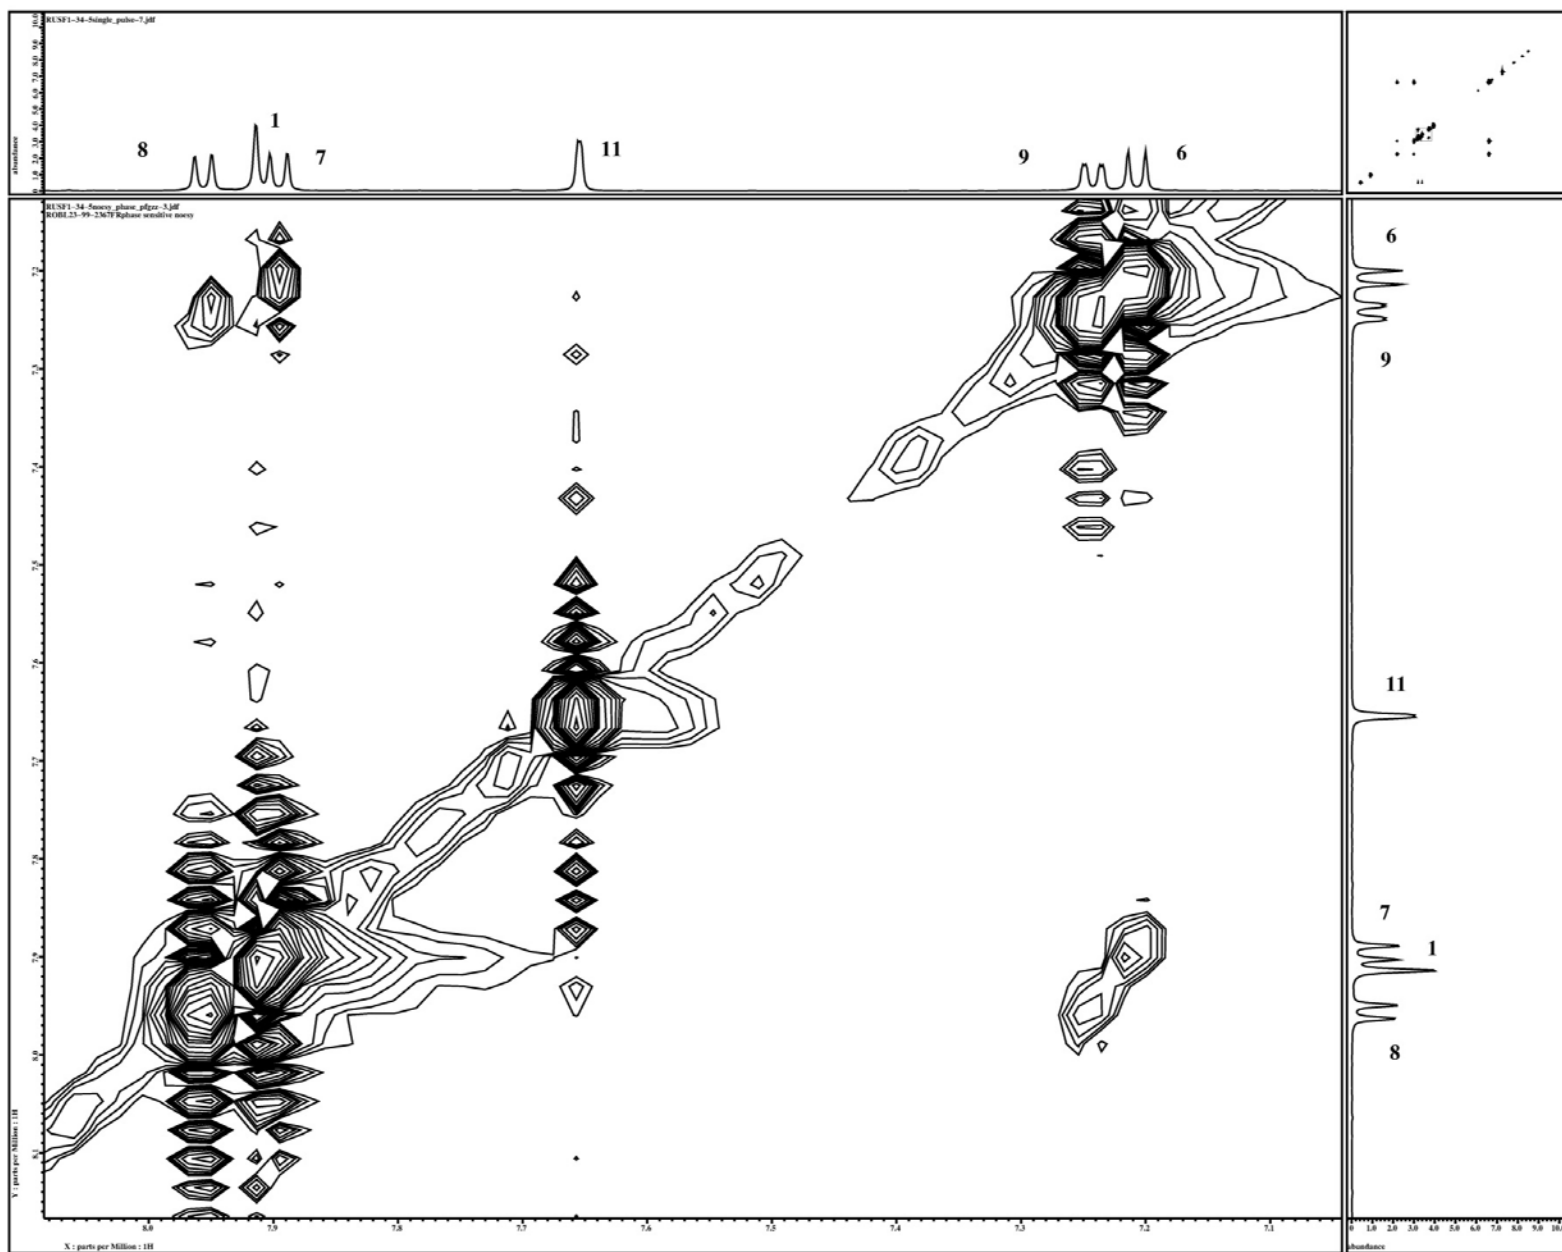

S15.  $^1\text{H}$ - $^{15}\text{N}$ -HMBC Spectrum of **1** (600 MHz  $d_6$ -DMSO).

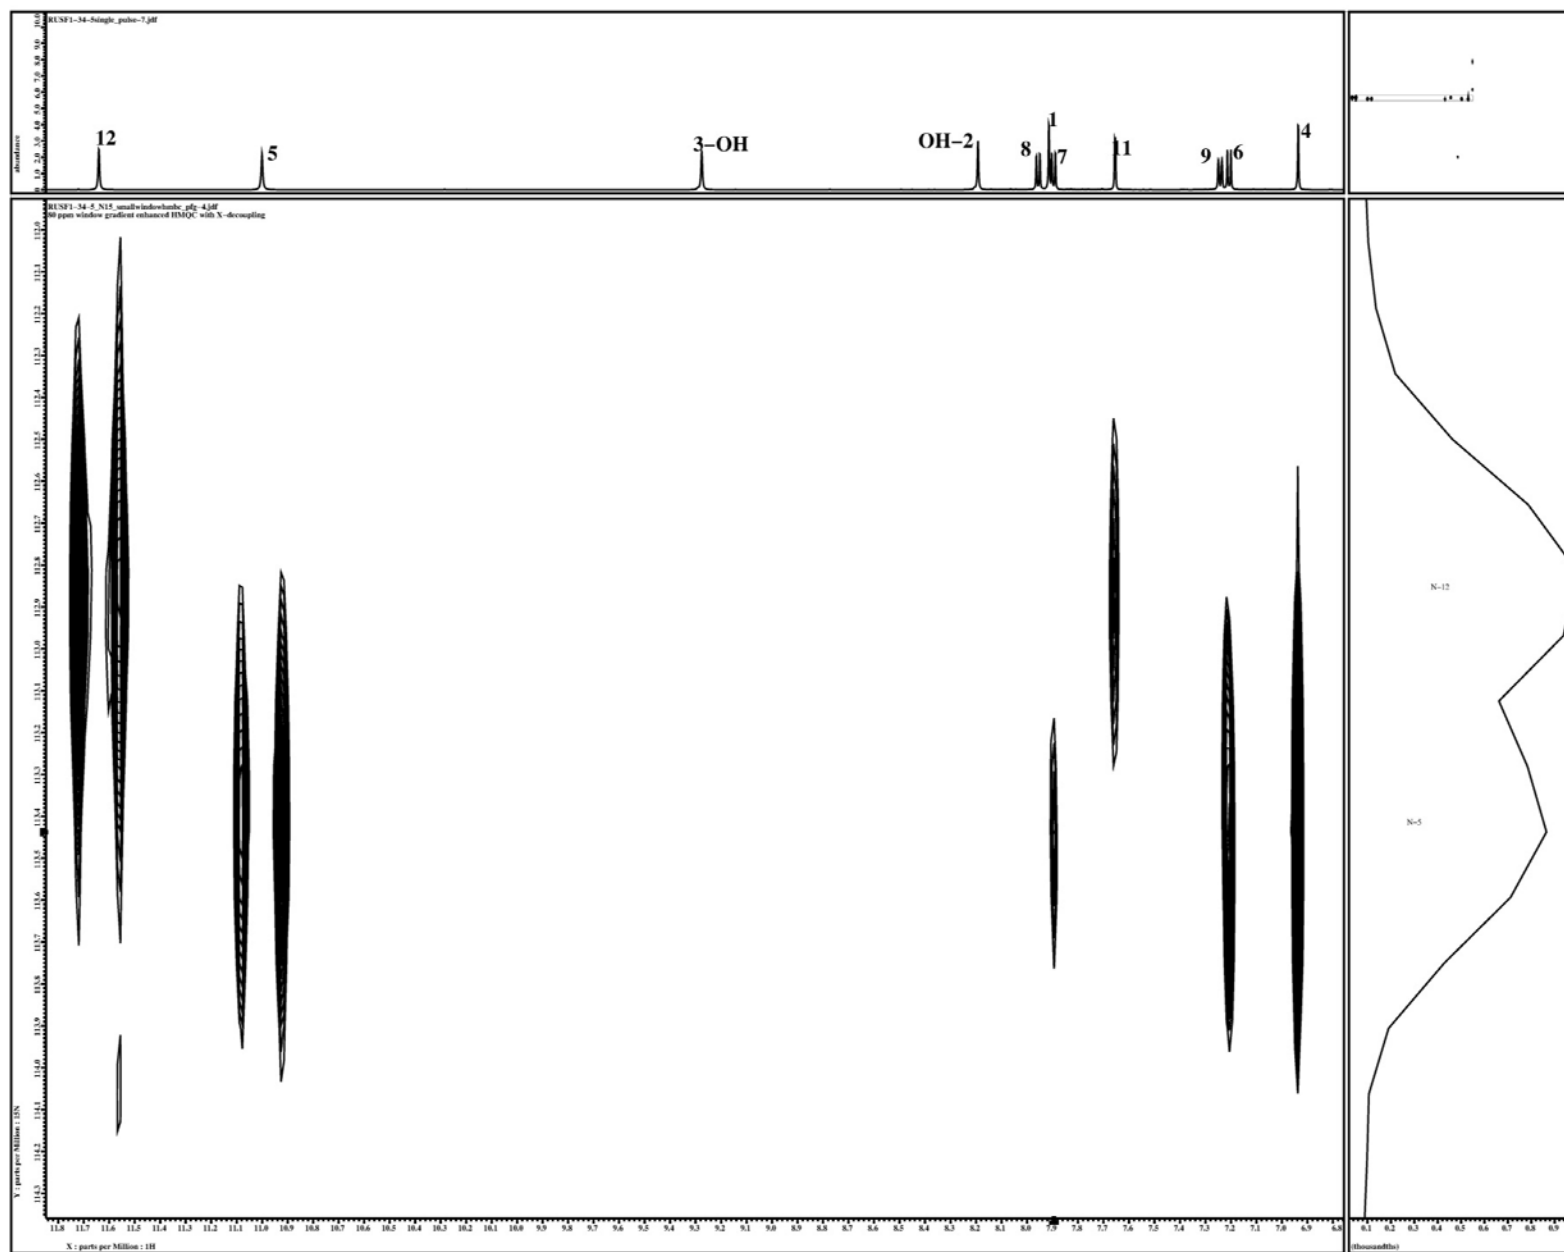

S16 Key HMBC Correlations that support the structure assignment for **2**.

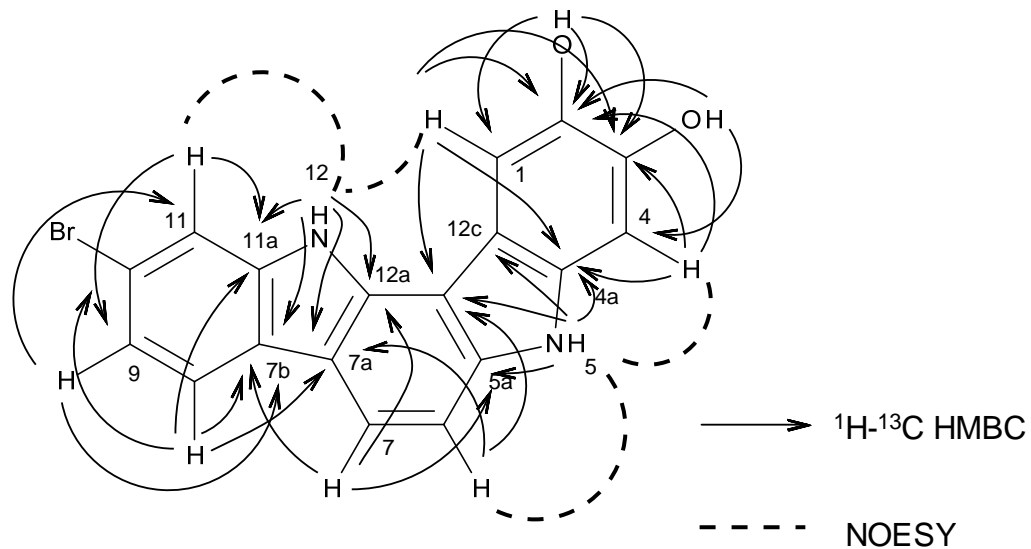

S17. Comparison of chemical shifts for molecules **1** and **2** for atoms 1 to 4 resulting from sulfate substitution at C-3.

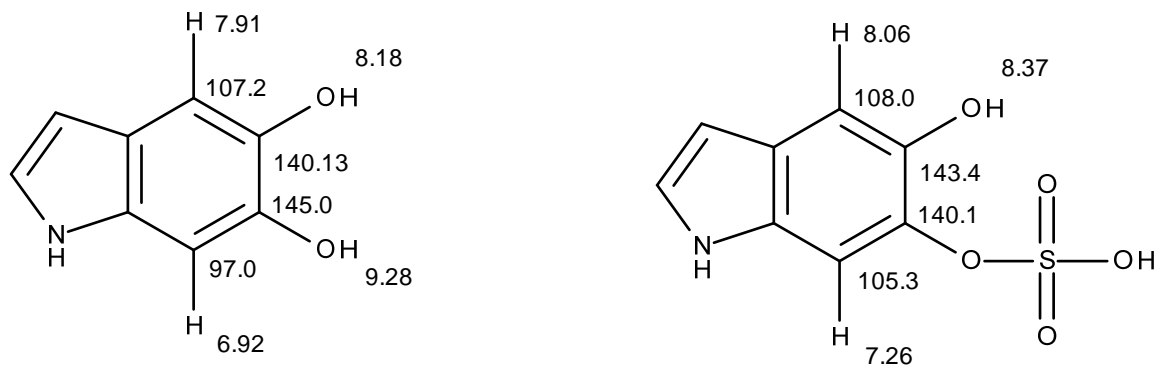

S18.  $^1\text{H}$  NMR Spectrum of **2** (600 MHz  $d_6$ -DMSO).

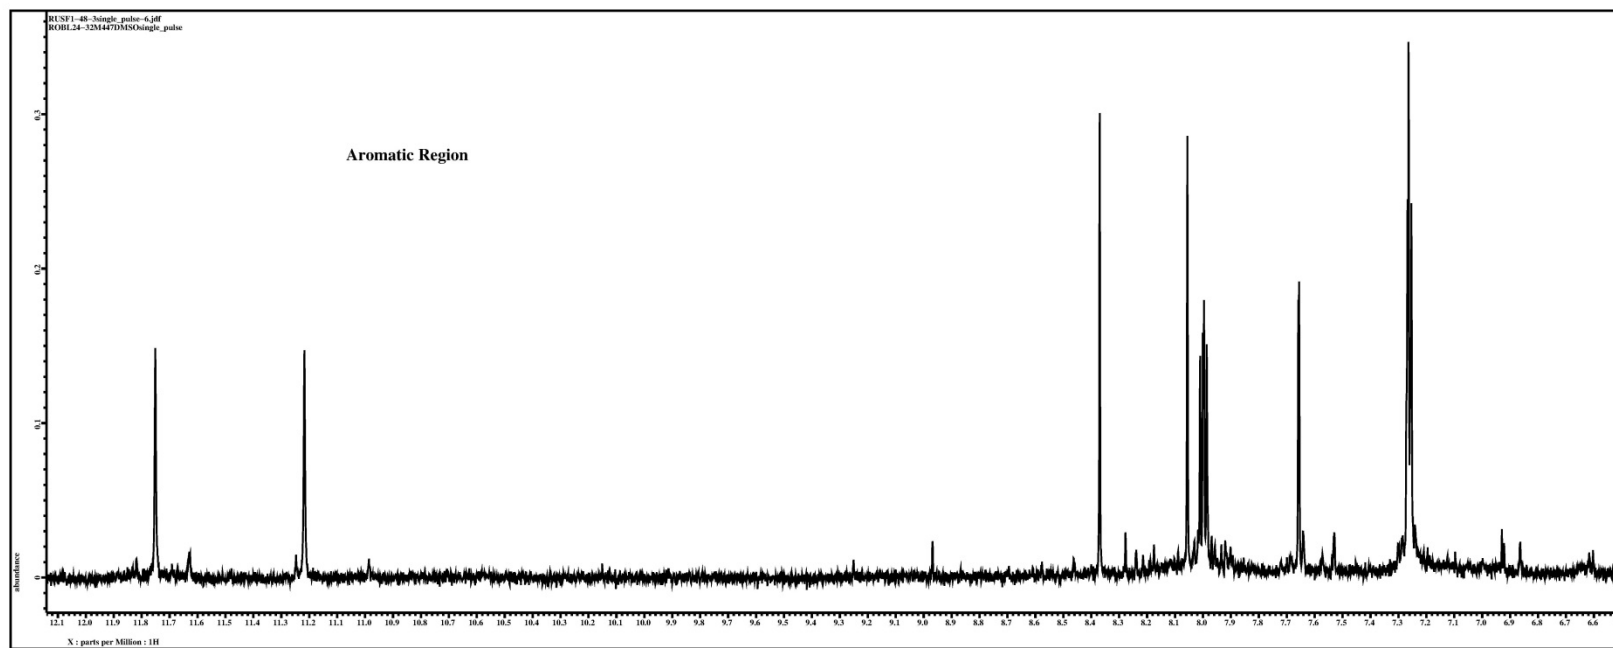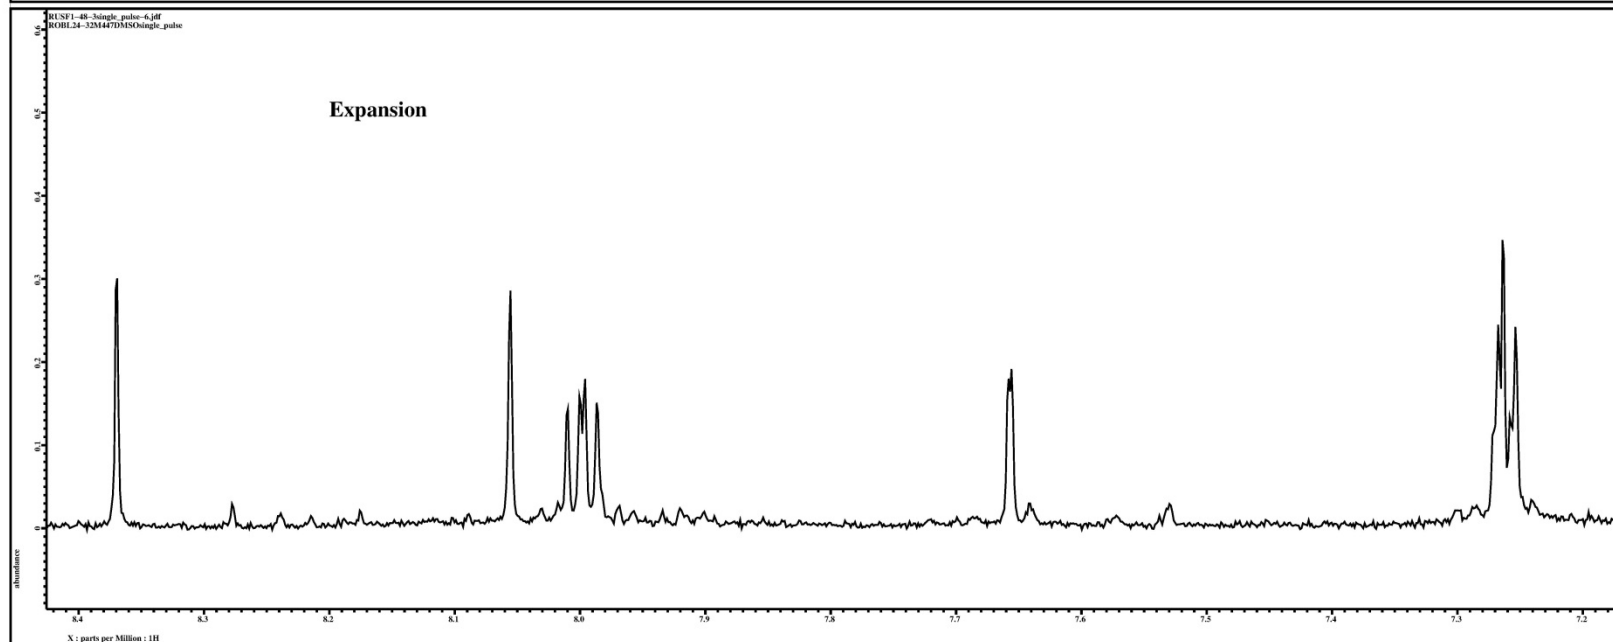



S.19  $^{13}\text{C}$  NMR Spectrum of **2** (150.9 MHz  $d_6$ -DMSO).

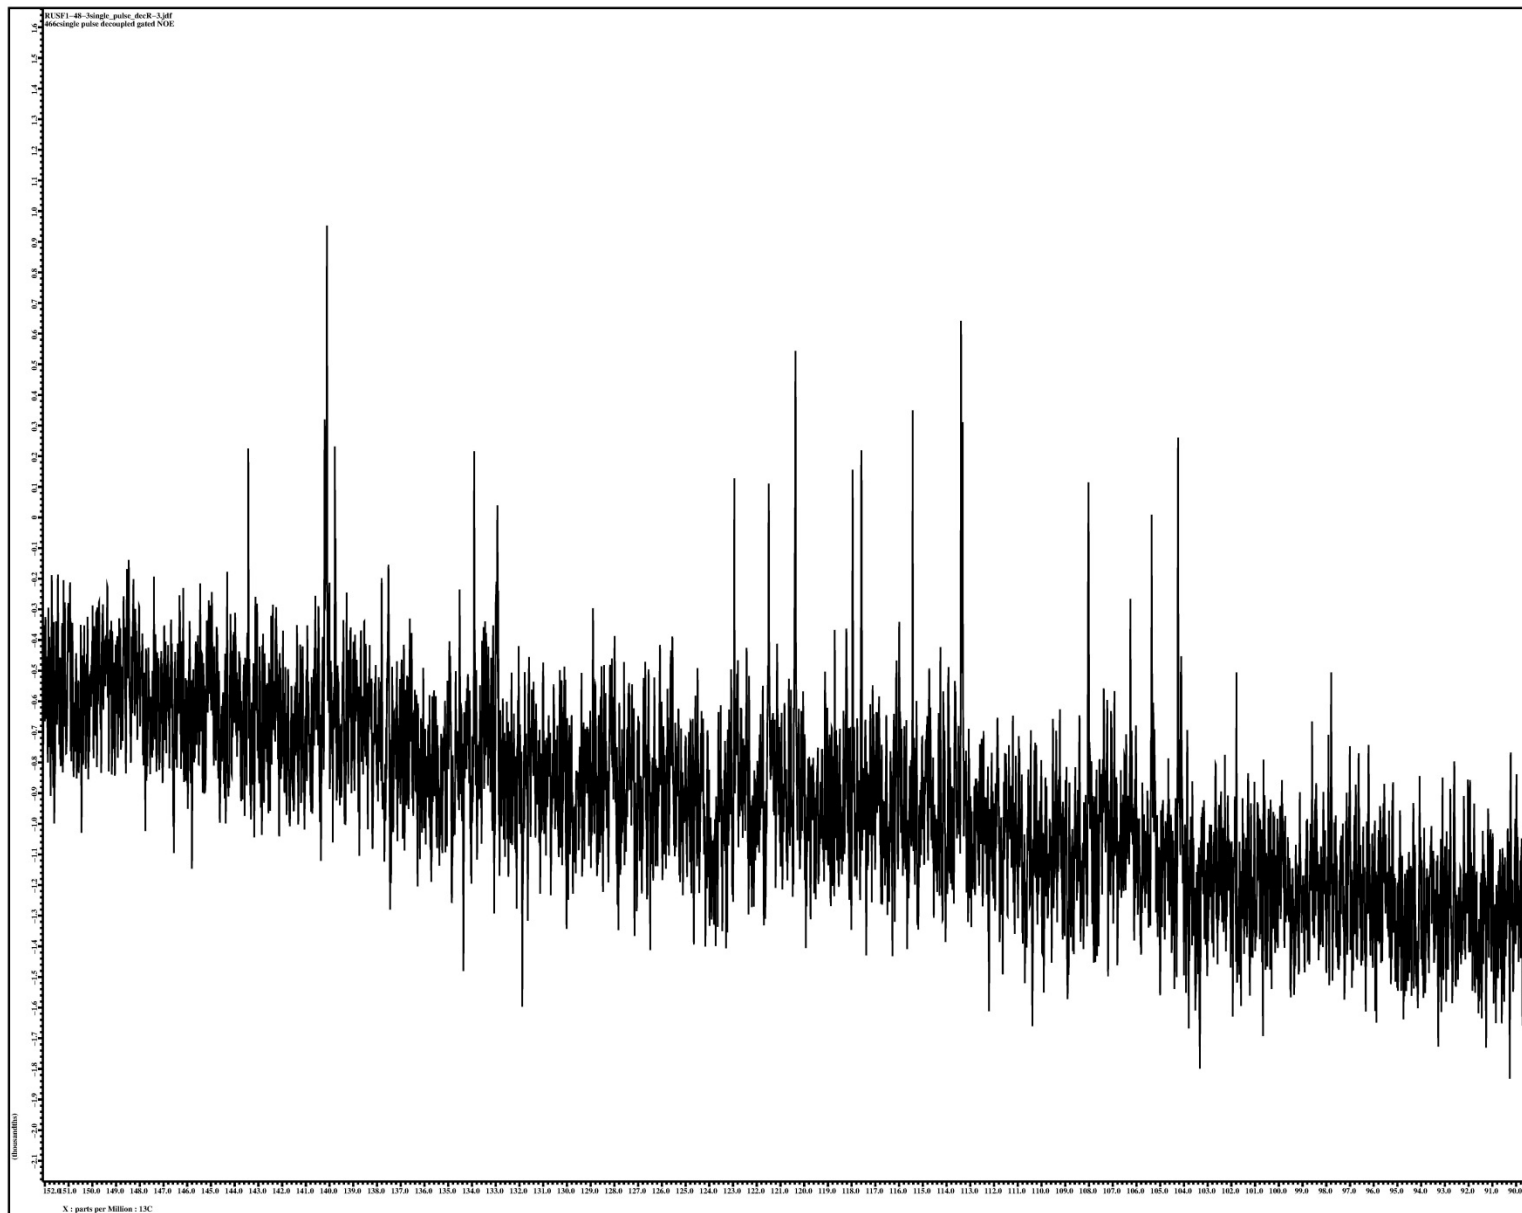

**S20.** Table of  $^1\text{H}$  and  $^{13}\text{C}$  NMR Data for **2** (DMSO- $d_6$ , 600 MHz)

| Position | $\delta\text{C}$ , mult. | $\delta\text{N}$ | $\delta\text{H}$ ( $J$ in Hz) | COSY  | HMBC                | NOESY |
|----------|--------------------------|------------------|-------------------------------|-------|---------------------|-------|
| 1        | 108.0, CH                |                  | 8.06, s                       |       | 12b,2,3, 4a         |       |
| 2        | 143.4, C                 |                  |                               |       |                     |       |
| OH-2     |                          |                  | 8.37, s                       |       | 1,2, 3              |       |
| 3        | 140.1, C                 |                  |                               |       |                     |       |
| 4        | 105.3, CH                |                  | 7.26, m                       |       | 2, 3, 4a            |       |
| 4a       | 132.9, C                 |                  |                               |       |                     |       |
| 5        |                          | 114              | 11.22, s                      |       | 5a, 12b, 12c,<br>4a | 4, 6  |
| 5a       | 140.2 <sup>c</sup> , C   |                  |                               |       |                     |       |
| 6        | 104.3, CH                |                  | 7.26, m                       | 7     | 7a, 12b             |       |
| 7        | 117.6, CH                |                  | 8.00, d (8.2)                 | 6     | 12a, 7b             |       |
| 7a       | 113.4 <sup>b</sup> , C   |                  |                               |       |                     |       |
| 7b       | 122.9, C                 |                  |                               |       |                     |       |
| 8        | 120.4, CH                |                  | 7.99, d (8.2)                 | 9     | 7a, 7b, 10, 11a     |       |
| 9        | 121.5, CH                |                  | 7.26, m                       | 8, 11 | 7b, 11              |       |
| 10       | 115.4, C                 |                  |                               |       |                     |       |
| 11       | 113.3 <sup>b</sup> , CH  |                  | 7.65, d (1.4)                 | 9     | 10, 11a             | 12    |
| 11a      | 140.3 <sup>c</sup> , C   |                  |                               |       |                     |       |
| 12       |                          | 113              | 11.75, s                      |       | 12a, 7a, 7b,<br>11a | 1, 11 |
| 12a      | 134.1, C                 |                  |                               |       |                     |       |
| 12b      | 106.2, C                 |                  |                               |       |                     |       |
| 12c      | 118.0, C                 |                  |                               |       |                     |       |

<sup>a</sup>HMBC correlations, optimized for 8 Hz, are from proton(s) stated to the indicated atom;  $^1\text{H}$  and  $^{13}\text{C}$  NMR data were measured at 600.2 and 150.9 respectively. <sup>b,c</sup> Assignments are interchangeable.

S.21 Edited *g*-HSQC Spectrum of **2** (600 MHz *d*<sub>6</sub>-DMSO).

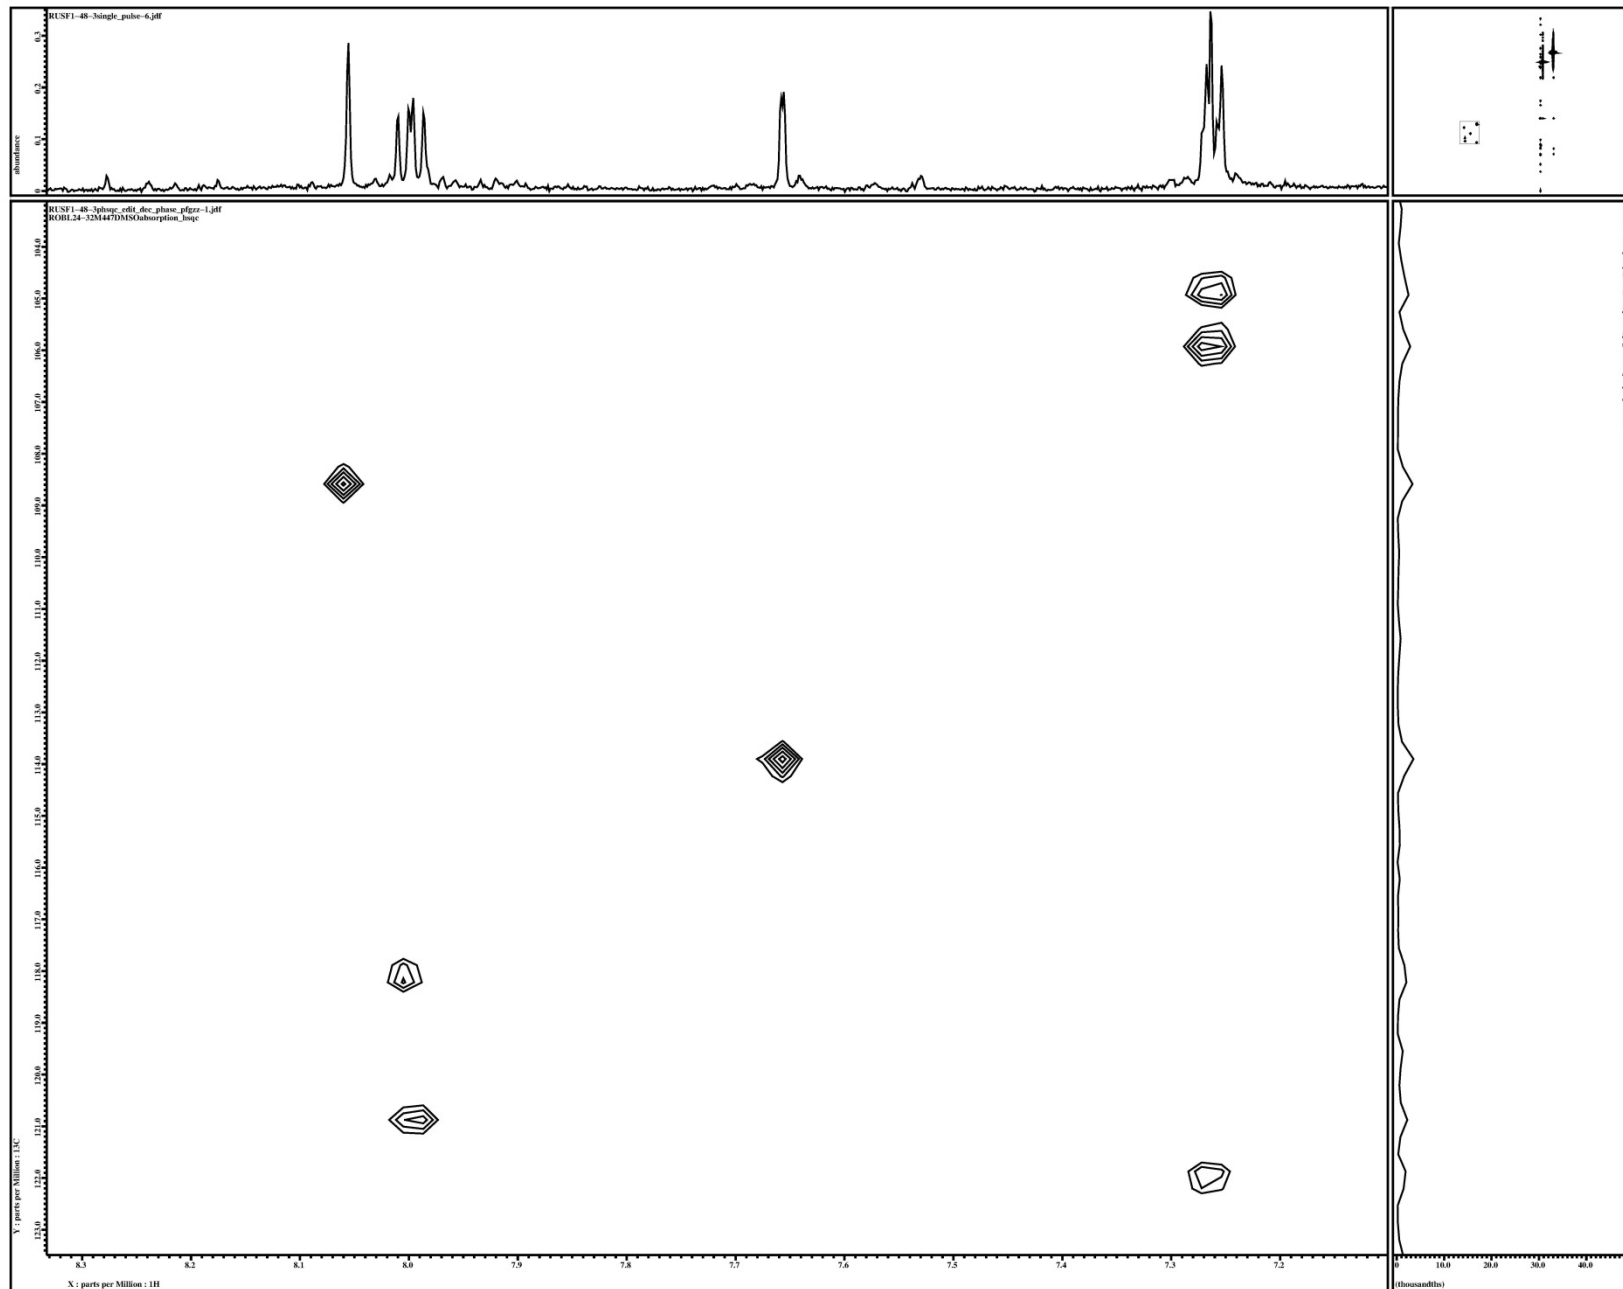

S.22  $^1\text{H}$ - $^{13}\text{C}$  *g*-HMBC Spectrum of **2** (600 MHz  $d_6$ -DMSO).

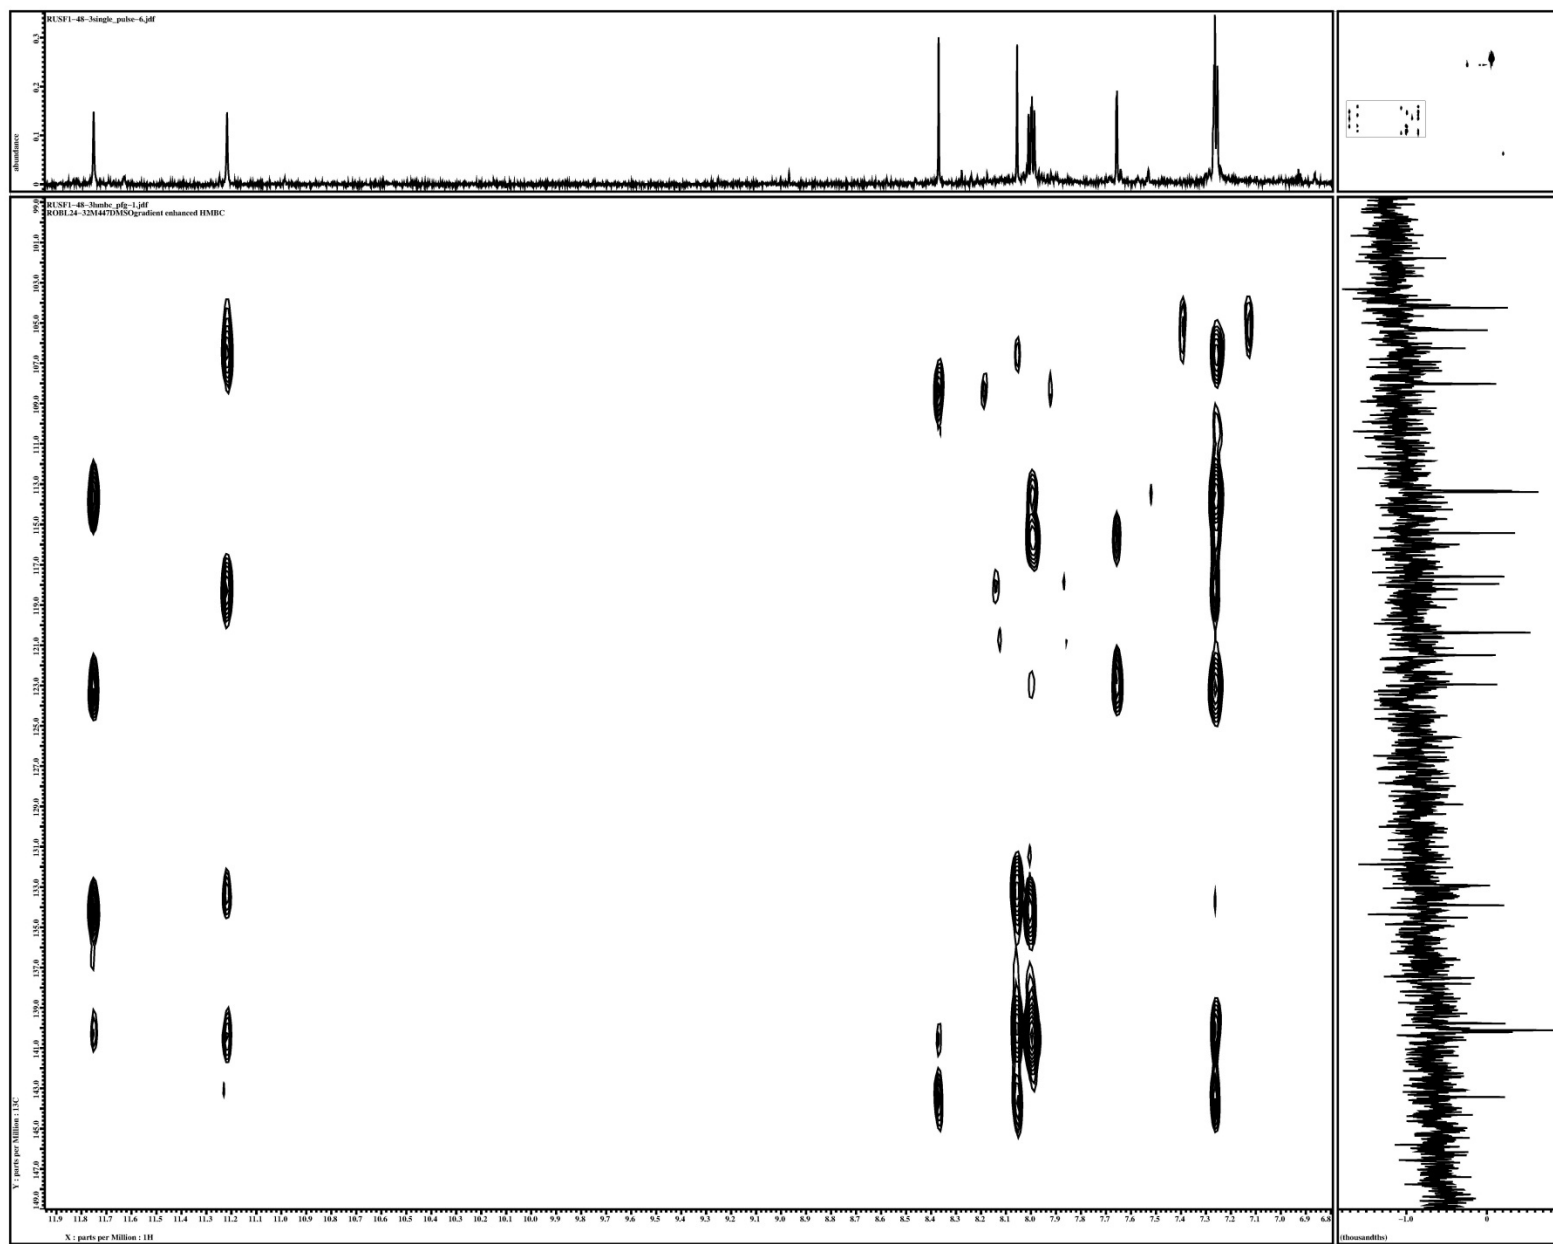

Supplement: np400501u_si_001.pdf [file np400501u_si_001.pdf]
